# Supplementary material for: Adherent cell remodeling on micropatterns is modulated by Piezo1 channels
Source: PubMed Central journal article supplement (PMC7930019; doi:10.1038/s41598-021-84427-y), 2021-03-03
Supplement: 41598_2021_84427_MOESM6_ESM.pdf [file 41598_2021_84427_MOESM6_ESM.pdf]

# **Adherent cell remodeling on micropatterns is modulated by Piezo1 channels**

Deekshitha Jetta<sup>1,†</sup>, Mohammad Reza Bahrani Fard<sup>1,†</sup>, Frederick Sachs<sup>2</sup>, Katie Munechika<sup>3</sup>, and

Susan Z. Hua<sup>1,2,\*</sup>

*<sup>1</sup>Department of Mechanical and Aerospace Engineering, <sup>2</sup>Department of Physiology and Biophysics, <sup>3</sup>Department of Biomedical Engineering, University at Buffalo, Buffalo, New York*

*14260, USA*

## Supplemental Materials

### Supplemental figures

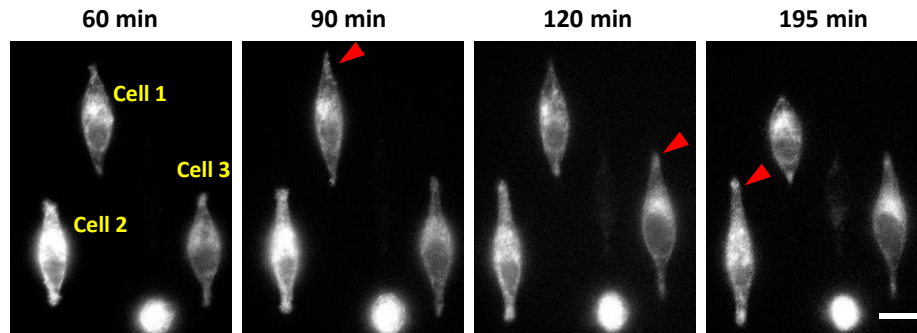

**SM Figure 1. Time sequence of HEK-hP1 cell extending on the pattern.** It shows that cells reached their maximum extension at different times. Red arrows indicate the cells in full elongation. Scale bar = 10  $\mu\text{m}$ .

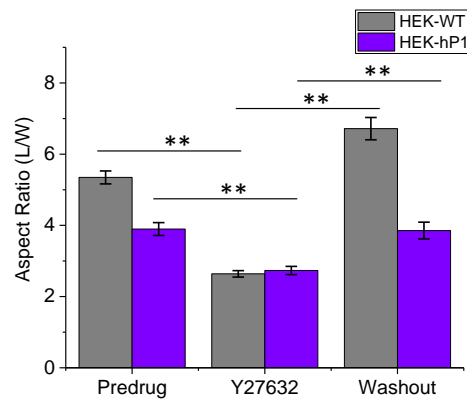

**SM Figure 2. Effect of Rho-ROCK inhibitor on HEK-hP1 cells.** Mean aspect ratio for pre-drug treatment, 20 min after treatment, and 60 min after washout for HEK-hP1 cells ( $n = 26$ ,  $**p < 0.001$ ) and control HEK cells ( $n = 60$ ,  $**p < 0.001$ ). It shows the effect of inhibitor was consistent in both HEK-hP1 and control cells.

## **Movies:**

**SM Movie 1. Expansion of control HEK cells on the stripes.** Brightfield images of control HEK cells on the stripes showing cell expansion along pattern axis. The images were acquired at 3 min intervals from 60 min after seeding for a total recording time of 195 min.

**SM Movie 2. Piezo1 knockout (P1KO) cells on the stripes.** Brightfield images of P1KO cells on the stripes, showing these cells were not able to elongate along the pattern. The images were acquired at 3 min intervals from 60 min after seeding for a total recording time of 120 min.

**SM Movie 3. Expansion of Piezo1 expressing (HEK-hP1) cells on the stripes.** Brightfield images of HEK-hP1 cells on the stripes showing cell expansion along pattern axis. The images were acquired at 3 min intervals from 30 min after seeding for a total recording time of 150 min.

**SM Movie 4. Translocation of Piezo1 plaques in hP1-HEK cells on the pattern.** Fluorescence images (GFP) of hP1-HEK cells on the pattern, showing Piezo1 plaques translocate to expansion tips during cell elongation. The images were acquired at 3 min intervals from 60 min after seeding for a total recording time of 150 min.

**SM Movie 5. Migration of a Piezo1 expressing cell on the pattern.** Fluorescence images (GFP channel, in 16 color map) of a hP1-HEK cell on the pattern, showing Piezo1 plaques mainly located at the leading edge of the cell. The images were acquired at 3 min intervals from 120 min after seeding for a total recording time of 60 min.
